1  
2  
3  
4  
5  
6  
7  
8  
9  
10  
11  
12  
13  
14  
15  
16  
17  
18  
19  
20  
21  
22  
23  
24

## Neural correlates of metacognition across the adult lifespan

Helen Overhoff<sup>a,b,c,\*</sup>, Yiu Hong Ko<sup>a,b,c</sup>, Daniel Feuerriegel<sup>b</sup>, Gereon R. Fink<sup>a,d</sup>, Jutta Stahl<sup>c</sup>, Peter H. Weiss<sup>a,d</sup>, Stefan Bode<sup>b</sup>, & Eva Niessen<sup>c</sup>

<sup>a</sup>Cognitive Neuroscience, Institute of Neuroscience and Medicine (INM-3), Research Centre Jülich, Leo-Brandt-Str. 5, 52425 Jülich, Germany

<sup>b</sup>Melbourne School of Psychological Sciences, University of Melbourne, Parkville Campus, Parkville 3010, Victoria, Australia

<sup>c</sup>Department of Individual Differences and Psychological Assessment, University of Cologne, Pohligstr. 1, 50969 Cologne, Germany

<sup>d</sup>Department of Neurology, Faculty of Medicine, University Hospital Cologne, University of Cologne, Kerpener Str. 62, 50937 Cologne, Germany

\*Corresponding author. Cognitive Neuroscience, Institute of Neuroscience and Medicine (INM-3), Research Centre Jülich, Leo-Brandt-Str. 5, 52425 Juelich, Germany.

*Email:* [h.overhoff@fz-juelich.de](mailto:h.overhoff@fz-juelich.de)

25 **Abstract**

26 Metacognitive accuracy describes the degree of overlap between the subjective perception of one's  
27 decision accuracy (i.e., confidence) and objectively observed performance. With older age, the  
28 need for accurate metacognitive evaluation increases; however, error detection rates typically  
29 decrease. We investigated the effect of ageing on metacognitive accuracy using event-related  
30 potentials (ERPs) reflecting error detection and confidence: the error/correct negativity ( $N_{e/c}$ ) and  
31 the error/correct positivity ( $P_{e/c}$ ). Sixty-five healthy adults (20 to 76 years) completed a complex  
32 perceptual task and provided confidence ratings. We found that metacognitive accuracy declined  
33 with age beyond the expected decline in task performance, while the adaptive adjustment of  
34 behaviour was well preserved.  $P_{e/c}$  amplitudes varied by confidence rating, but they did not mirror  
35 the reduction in metacognitive accuracy.  $N_{e/c}$  amplitudes decreased with age except for high  
36 confidence correct responses. The results suggest that age-related difficulties in metacognitive  
37 evaluation could be related to an impaired integration of decision accuracy and confidence  
38 information processing. Ultimately, training the metacognitive evaluation of fundamental decisions  
39 in older adults might constitute a promising endeavour.

40

41 *Keywords:* confidence, error detection, aging, error(-related) negativity ( $N_e$ , ERN), error  
42 positivity ( $P_e$ ), behavioral adaptation

## 43 1. Introduction

44 We are continuously monitoring and controlling our behaviour in order to achieve goals  
45 and avoid errors. The internal evaluation of our behaviour and our decisions, also referred to as  
46 *metacognition*, is crucial in everyday life, because it guides our present and future behaviour  
47 (Desender et al., 2018; Rabbitt, 1966). Metacognition comprises both the detection of committed  
48 errors and a feeling of confidence that accompanies a decision (Fleming and Frith, 2014; Shekhar  
49 and Rahnev, 2020). When we feel less confident about a decision, we might try to adjust it, seek  
50 more information, or recruit additional cognitive processes to optimise performance (Desender et  
51 al., 2019a, 2019b). As ageing is usually associated with declining cognitive functions and higher  
52 rates of decision errors in daily activities, decisions and corresponding motor actions need to be  
53 adjusted more often (Hertzog, 2015; Ruitenberg et al., 2014). This might be achieved, for example,  
54 by increasing efforts for an efficient metacognitive evaluation of one's behaviour.

55 In general, metacognitive judgements are highly predictive of actual task performance, yet  
56 there is strong evidence that metacognition constitutes a dissociable process from the execution of  
57 the initial task (Galvin et al., 2003; Song et al., 2011). The degree to which subjective perceptions  
58 and objectively observed performance overlap, that is, the *accuracy* of metacognitive judgements,  
59 varies across individuals and task demands (Fleming & Dolan, 2012; Hertzog & Hultsch, 2000;  
60 Rahnev et al., 2020). Metacognitive accuracy has been addressed in two separate but arguably  
61 related fields of research: studies on error detection, focussing on the recognition of errors, and  
62 studies on decision confidence, investigating processes related to beliefs regarding the likelihood  
63 of having made a correct choice. In most cases, low confidence implies a higher probability of  
64 having committed an error. It has been suggested that error detection and confidence judgements  
65 might even share similar underlying computations, whereby error detection arises from low

66 confidence that a correct decision has been made (Boldt and Yeung, 2015; Yeung and Cohen, 2006;  
67 Yeung and Summerfield, 2014).

### 68 **1.1 Neural correlates of metacognition**

69 Neural correlates of metacognition have been studied by measuring event-related potentials  
70 (ERPs) of the human scalp electroencephalogram (EEG). The error negativity ( $N_e$ ) is a negative  
71 deflection peaking around 100 ms after an overt behavioural response at fronto-central electrodes  
72 and typically has larger amplitudes for errors than correct responses ( $N_e$  for correct responses; i.e.,  
73 correct negativity; Falkenstein et al., 1991; Falkenstein et al., 2000; Vidal et al., 2003). The  
74 component is classically associated with conflict monitoring, assuming that it tracks conflict  
75 between the given response and continuously-accumulated post-decision evidence favouring the  
76 correct response (Falkenstein et al., 1991; Yeung et al., 2004). Moreover, it has been shown that  
77 the  $N_e$  amplitude scales with confidence, that is, it decreases from perceived errors to uncertain  
78 responses (guesses) to trials where the participant is confident about its correctness (Boldt and  
79 Yeung, 2015; Scheffers and Coles, 2000). The more posterior error positivity ( $P_e$ ;  $P_e$  for correct  
80 responses, i.e., correct positivity) with a maximum amplitude around 250 ms after a response, is  
81 considerably larger for detected compared to undetected errors and has therefore been associated  
82 with explicit error awareness (Endrass et al., 2012a; Nieuwenhuis et al., 2001). Notably, the  $P_e$  has  
83 also been found to increase in amplitude with decreasing confidence in perceptual decisions (Boldt  
84 and Yeung, 2015; Rausch et al., 2019).

85 Concerning the mechanisms underlying these two components, Di Gregorio et al. (2018)  
86 designed a sophisticated task to provide evidence that the  $P_e$ , but not the  $N_e$ , was present when it  
87 was evident for participants that an error had been made, but they did not know the correct answer.  
88 These findings suggest that the  $P_e$  does not require a representation of the correct response to  
89 emerge, but instead accumulates post-decisional error evidence from widely distributed neural

90 sources (Di Gregorio et al., 2018; Murphy et al., 2015; Steinhäuser and Yeung, 2010; Yeung and  
91 Summerfield, 2014). Thus, while both classical components of error processing,  $N_e$  and  $P_e$ , have  
92 been shown to vary with reported confidence, the  $P_e$  appears to be more specifically associated  
93 with conscious metacognitive processes (Boldt and Yeung, 2015; Nieuwenhuis et al., 2001;  
94 Scheffers and Coles, 2000).

## 95 **1.2 Metacognition and ageing**

96 Metacognitive abilities in older age have been shown to vary across cognitive domains  
97 (Fitzgerald et al., 2017; Hertzog & Hultsch, 2000). For instance, while older adults tend to  
98 underestimate the prevalence of their decision errors in everyday life, metacognitive judgements  
99 of certain memory aspects (e.g., memory encoding) seem to be well preserved (Castel et al., 2016;  
100 Harty et al., 2013; Mecacci and Righi, 2006). Previous studies on decision making and  
101 metacognition yielded relatively consistent findings of a significant decline in error detection rate  
102 with higher age across multiple tasks (Harty et al., 2013; Rabbitt, 1990), even when task  
103 performance was comparable (Harty et al., 2017; Niessen et al., 2017; Wessel et al., 2018). In a  
104 large sample of healthy adults, Palmer et al. (2014) investigated decision confidence using a  
105 measure of metacognitive accuracy that takes task performance into account (Maniscalco & Lau,  
106 2012). The authors found that age was not correlated with metacognitive abilities in a memory task,  
107 but that it was negatively correlated with metacognitive abilities in a perceptual discrimination task.

108 Effects of ageing on the neural correlates of metacognition have primarily been investigated  
109 in the field of error detection. Here, both the difference between  $N_e$  and  $N_c$  (Endrass, Schreiber, et  
110 al., 2012; Falkenstein et al., 2001; Schreiber et al., 2011), and the  $P_{e/c}$  amplitude (Clawson et al.,  
111 2017; Harty et al., 2017; Niessen et al., 2017) was smaller in older adults, while the decrease in  $P_e$ ,  
112 in particular, was linked to a lower error detection rate. Notably, the processing of the stimulus can  
113 also affect subsequent response-related processes, and variations with age in two ERPs (namely

114 the N2 and the P300; Groom & Cragg, 2015; Polich, 2007) have been documented (Korsch et al.,  
115 2016; Larson et al., 2016; Lucci et al., 2013; Niessen et al., 2017). With the decline in behavioural  
116 performance reported above, this suggests an impaired error evidence accumulation process in  
117 older age, possibly due to limited cognitive resources (Harty et al., 2017; Niessen et al., 2017).  
118 Surprisingly, neither  $N_{e/c}$  nor  $P_{e/c}$  have been investigated using confidence ratings to assess age-  
119 related variations of metacognitive abilities. Some evidence from neuroimaging studies point to  
120 age-related structural differences in the neural basis of metacognition (Chua et al., 2009; Hoerold  
121 et al., 2013; Sim et al., 2020). However, a conclusive account that explains individual differences  
122 in metacognitive accuracy is still missing, for which the use of ERPs with high temporal resolution  
123 might be well-suited to provide valuable insights (Dully et al., 2018; Fleming and Dolan, 2012;  
124 Yeung and Summerfield, 2014).

### 125 **1.3 The current study**

126 This study aimed to investigate task performance and metacognition in older adults with a  
127 novel perceptual task to determine how generalizable the findings of decreased metacognitive  
128 accuracy in older age are (Palmer et al., 2014). For this, we used a colour-flanker task, in which  
129 participants had to identify the colour of a target stimulus that was flanked by two squares of the  
130 same or a different colour. We assessed decision accuracy, measured confidence using a four-point  
131 rating scale, and examined the impact of metacognitive accuracy on adaptations of subsequent  
132 behaviour (Desender et al., 2019a; Fleming et al., 2012; Ruitenberg et al., 2014). Furthermore, we  
133 investigated whether the amplitudes of  $N_{e/c}$  and  $P_{e/c}$ , which are described as neural correlates of  
134 metacognition, track changes in decision confidence across the lifespan.

135 We hypothesised that metacognitive accuracy in our decision task would decrease with age  
136 (Niessen et al., 2017; Palmer et al., 2014). Independent of confidence, we expected an error-specific  
137 attenuation of ERP component amplitudes in older adults, which should result in a smaller

138 difference between the neural responses related to errors and correct decisions (Endrass et al.,  
139 2012b; Larson et al., 2016). Independent of age, reported confidence was expected to show a  
140 positive association with the  $N_{e/c}$  and a negative association with the  $P_{e/c}$  amplitude (Boldt and  
141 Yeung, 2015; Scheffers and Coles, 2000). Based on findings from error detection studies showing  
142 an age-related decrease in the  $P_e$  amplitude of detected, but not undetected errors (Harty et al.,  
143 2017; Niessen et al., 2017), as well as reports linking the  $P_e$  to confidence (Boldt and Yeung, 2015),  
144 we expected a specific decrease in  $P_e$  amplitude for low confidence errors with increasing age.

145

## 146 **2. Methods**

### 147 **2.1 Participants**

148 We recruited 82 healthy adults with a broad age range from 20 to 81 years ( $49.8 \pm 1.9$  years  
149 [all results are indicated as mean  $\pm$  standard error of the mean; *SEM*]; 35 female, 47 male). We  
150 aimed for an approximately uniform distribution of age and thus tested at least 10 participants per  
151 decade. Inclusion criteria were right-handedness according to the Edinburgh Handedness Inventory  
152 (EDI; Oldfield, 1971), fluency in German, (corrected-to-) normal visual acuity and no history of  
153 neurological or psychiatric diseases. Any signs of cognitive impairment (Mini-Mental-State  
154 Examination score lower than 24; MMSE; Folstein et al., 1975) or depression (Beck's Depression  
155 Inventory score higher than 17; BDI; Hautzinger, 1991) led to the exclusion of participants (one  
156 participant was excluded). Additionally, we excluded four participants who had more than one  
157 third of invalid trials (e.g., responses were too slow to fall into the pre-defined response window  
158 for analysis, or they showed recording artefacts). Another four participants were excluded because  
159 of an error rate (ER) higher than the chance level of 75%. Finally, eight participants were excluded  
160 because of combinations of very low accuracy, a high number of invalid trials, the selective use of  
161 single response keys, and errors in the colour discrimination task (described below), which

162 suggested a lack of understanding of the task or the use of heuristic response strategies instead of  
163 trial-by-trial decisions. After exclusions, the final sample consisted of 65 healthy adults ( $45.5 \pm$   
164 2.0 years; 20 to 76 years; 26 female, 39 male).

165 The study was approved by the ethics committee of the German Psychological Society  
166 (DGPs) and conformed to the declaration of Helsinki. All participants gave written informed  
167 consent before participating in the experiment.

## 168 **2.2 Experimental paradigm**

169 The main experimental task consisted of a modified version of the Eriksen flanker task  
170 using coloured squares as stimuli and four response options (Eriksen & Eriksen, 1974; Maier &  
171 Steinhauser, 2017; Figure 1A). Participants were asked to respond as fast and accurately as possible  
172 to a centrally presented target by pressing a button with one of their index or middle fingers,  
173 mapped onto four designated target colours. In each trial, the target consisted of one of these target  
174 colours, and the flankers, located right and left to the target, consisted either of the same colour as  
175 the target (congruent condition), of another target colour (incongruent condition), or of one of three  
176 additional neutral colours, which were not mapped to any response (neutral condition [Maier et al.,  
177 2008]; see Figure 1B). Both the incongruent and the neutral condition were used to induce conflict  
178 as they provided information distinct from the target. We chose this version of the classical flanker  
179 paradigm in order to increase task difficulty and thereby maximise the number of errors without  
180 tapping into other cognitive processes that might be affected by ageing (e.g., spatial, lexical, or  
181 semantic cognition). The colour-finger mapping was fixed over the course of the experiment for  
182 each participant and counterbalanced across participants.

183 Each trial started with a fixation cross for 500 ms. Then, flankers were presented for 50 ms  
184 before the target was added to the display for another 100 ms. Showing the (task-irrelevant)

185



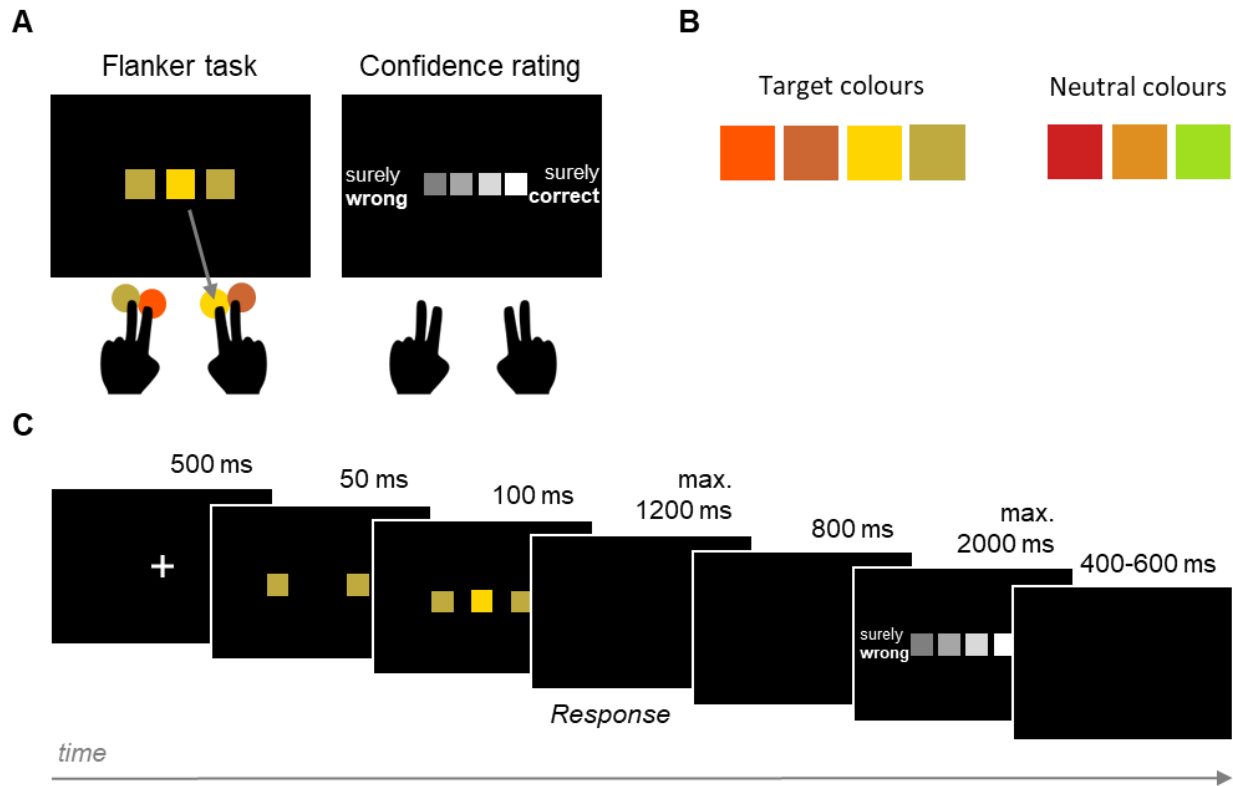

186

187 *Figure 1.* (A) The left panel shows an example of a trial in the flanker task, where one central target  
188 and two flankers were presented, and the participant had to press the finger that was assigned to  
189 the respective target colour (illustrated by the grey arrow). The confidence rating (right panel)  
190 consisted of four squares, and the ends of the scale were labelled with the German words for ‘surely  
191 wrong’ on the left and ‘surely correct’ on the right side. The fingers were mapped onto the four  
192 squares according to their spatial location. (B) Colours used in the flanker task. Flanker stimuli  
193 could consist of target or neutral colours, whereas target stimuli could only consist of one of the  
194 four target colours. (C) Sequence of one trial (here, incongruent). Each trial started with a fixation  
195 cross, followed by the presentation of the flankers, to which the target was added shortly after.  
196 Then, the screen turned black until a response was registered (maximum 1,200 ms), followed by  
197 another blank screen. If a response had been given, the rating scale appeared until a rating was  
198 given (maximum 2,000 ms). If no response had been given within the designated time window, the

199 German words for 'too slow' were shown instead. The trial ended with another blank screen for a  
200 random intertrial interval.

201  
202 flankers before the target was expected to increase the induced conflict (Mattler, 2003). We used a  
203 response deadline of 1,200 ms because this timing provided a good balance between a desirable  
204 number of errors and feasibility for all participants. If no response was registered before this  
205 deadline, the trial was terminated and the feedback 'zu langsam' (German for 'too slow') was  
206 presented on the screen. If a response was given, a confidence rating scale appeared after a black  
207 screen of 800 ms. The delay was introduced to avoid that EEG activity related to the first response  
208 overlapped with the confidence assessment. Participants were asked to indicate their confidence in  
209 their decision on a four-point rating scale from 'surely wrong' to 'surely correct' using the same  
210 keys as for the initial response. The maximum time for the confidence judgment was 2,000 ms.  
211 Trials were separated by a jittered intertrial interval of 400 to 600 ms. The sequence of an  
212 experimental trial is depicted in Figure 1C.

### 213 **2.3 Procedures**

214 Prior to testing, participants were asked to provide demographic details and complete the  
215 handedness questionnaire. Afterwards, they completed a brief colour discrimination task (without  
216 EEG) to ensure that all participants were able to correctly discriminate the seven different colours  
217 used in the experimental paradigm (see Figure 1B). The discrimination task was followed by the  
218 EEG preparation and the main task. The neuropsychological tests were administered after the  
219 experiment. In addition, we assessed sustained attention span and processing speed using the d2-  
220 test (Brickenkamp, 2002), which have been shown to be positively associated with error processing  
221 abilities (Larson et al., 2011).

222 All stimuli in both tasks were presented on a black screen (LCD monitor, 60 Hz) in an  
223 electrically shielded and noise-insulated chamber with dimmed illumination, using Presentation  
224 software (Neurobehavioural Systems, version 14.5) for the colour discrimination task and  
225 uVariotest software (Version 1.978) for the main task. A chin rest ensured a viewing distance of  
226 70 cm to the screen and minimised movements. To record participants' responses, we used custom-  
227 made force-sensitive keys with a sampling rate of 1024 Hz (see Stahl et al., 2020).

228 The experiment started with a practice block of 18 trials in which participants received  
229 feedback about the accuracy of their response, which could be repeated if the participant considered  
230 it necessary. After that, two additional blocks with 72 trials without feedback and confidence  
231 assessments served as training blocks, allowing the participants to memorise the colour-finger  
232 mapping and to get accustomed to the response keys. Afterwards, another practice block introduced  
233 the confidence rating to ensure that participants understood and correctly applied the rating scale.  
234 The following main experiment consisted of five blocks with 72 trials each. Participants were  
235 allowed to take self-timed breaks after each block. The entire session lasted approximately three  
236 hours.

#### 237 **2.4 Electroencephalography recording and preprocessing**

238 The EEG was recorded using 61 active electrodes (Acticap, Brain Products) aligned  
239 according to the international 10-20 system (Jasper, 1958). The electrodes were online referenced  
240 against the posterior Iz electrode close to theinion. Horizontal eye movements were measured  
241 using two electrodes at the outer canthi of the eyes (horizontal electrooculogram [EOG]), and  
242 another electrode underneath the left eye measured vertical movements (vertical EOG). The EEG  
243 signal was recorded continuously at a sampling rate of 500 Hz using a digital BrainAmp DC  
244 amplifier (Brain Products). Data were filtered between 0.1 Hz and 70 Hz, and a notch filter of 50  
245 Hz was applied to remove line noise.

246 EEG data were preprocessed following a standardised pipeline using the MATLAB-based  
247 toolboxes EEGLAB and ERPLAB (Delorme and Makeig, 2004; Lopez-Calderon and Luck, 2014).  
248 The signal was segmented from -150 to 2,000 ms relative to target stimulus presentation (note that  
249 the flankers were presented at -50 ms). Epochs were visually inspected for artefacts and noisy  
250 electrodes. Epochs with artefacts were removed and identified noisy channels were interpolated  
251 using spherical spline interpolation. To identify and remove eyeblinks, we ran an Independent  
252 Component Analysis (ICA) using the infomax algorithm implemented in EEGLAB and afterwards  
253 baseline-corrected the epochs using the period of -150 ms to -50 ms to avoid influences of early  
254 perceptual processes related to the flanker presentation. Next, data were locked to the response,  
255 epoched from -150 ms to 800 ms relative to response onset and baseline-corrected using the 100 ms  
256 before the response. The additional analysis of conflict-related stimulus-locked ERPs can be found  
257 in the supplementary material S3. Remaining artefacts exceeding  $\pm 150 \mu\text{V}$  were removed (Niessen  
258 et al., 2017), and a current source density (CSD) analysis was conducted using the CSD toolbox  
259 (Kayser and Tenke, 2006) allowing for better spatial isolation of ERP components and for  
260 obtaining a reference-independent measure (Perrin et al., 1989).

## 261 **2.5 Behavioural data analysis**

262 Trials with invalid responses (i.e., responses that were too slow) or recording artefacts, as  
263 well as responses faster than 200 ms were excluded from further analysis. The error rate (ER) was  
264 calculated as the proportion of errors relative to valid responses. Response time (RT) was defined  
265 as the time between stimulus onset and the initial crossing of the force threshold (40 cN) by any of  
266 the response keys. For pre-defined conditions of interest (see below), individual median RTs were  
267 computed, and the means across participants were entered into group-level statistical analyses.

268 To inspect how the confidence scale was used across participants, raw distributions of  
269 confidence ratings within all incorrect and correct responses were extracted. We computed

270 Friedman ANOVAs for the percentage of each of each rating level for errors and correct responses  
271 with the factor confidence (4 levels). This analysis revealed that only a limited number of trials  
272 was available for the two middle confidence rating levels ('maybe wrong', 'maybe correct'), and  
273 we therefore collapsed those to create one category for all further analyses representing 'unsure'  
274 responses, i.e., confidence ratings expressing uncertainty.

275 For the analysis of metacognitive accuracy, we computed the Phi ( $\Phi$ ) correlation  
276 coefficient, which is a simple trial-wise correlation between task accuracy and reported confidence.  
277 It describes the extent to which the distributions of confidence ratings for correct and incorrect  
278 trials differ (Fleming and Lau, 2014; Kornell et al., 2007; Nelson, 1984). Phi was calculated by  
279 correlating accuracy, coded as 0 (error) and 1 (correct response), and confidence (that the given  
280 response was correct), coded as 1 ('surely wrong'), 2 ('unsure'), and 3 ('surely correct'), for each  
281 participant. This provided us with one measure of metacognitive ability per participant that  
282 comprises both the accuracy and the confidence rating of each trial (e.g.,  $\Phi = 1$  means that correct  
283 trials were successfully identified as such without uncertainty; while a  $\Phi = 0$  means that all errors  
284 were rated as 'surely correct', or all correct trials were rated as 'surely incorrect').

285 To assess the impact of accuracy and confidence on trial  $n$  on adaptations of behavioural  
286 responses, we computed a measure of response caution on trial  $n+1$  by multiplying the individual  
287 percentage correct and median RT (Desender et al., 2019a). Response caution captures the trade-  
288 off between speed and accuracy in a decision, with higher values indicating a more cautious  
289 response strategy that is characterised by slower, and at the same time, more accurate responses.  
290 For this analysis, only to pairs of consecutive valid trials were included. Response caution was  
291 computed separately relative to a) initial trial accuracy (error, correct), and b) each confidence  
292 category ('surely wrong', 'unsure', 'surely correct') of the initial trial.

293 Age-related effects on the d2-test score, the error rate, and Phi were computed using  
294 Pearson correlations between these behavioural variables and age. To rule out that metacognitive  
295 accuracy was confounded by task performance or attention and processing speed, we computed  
296 partial correlations between Phi and age, controlling for the individual error rate and d2-test score,  
297 respectively.

298 For the analysis of performance and confidence across the lifespan, we performed a series  
299 of one-way repeated measures ANCOVAs with age as the between-subject covariate of interest.  
300 The dependent variables were error rate, RT, and response caution, and either accuracy (error,  
301 correct), or (pooled) confidence (3 levels) served as the within-subject factor.

302 Significant main effects of accuracy or confidence were followed up by planned paired-  
303 samples *t*-tests comparing the dependent variable between all levels. Significant interactions with  
304 age were followed up by Pearson correlations, separately for each level of a given within-subject  
305 factor. We used these follow-up tests because our main interest was in the differential relations  
306 between accuracy, confidence, and behaviour across the lifespan (rather than between the levels).

307 Post-hoc tests were computed using Bonferroni corrected *p*-values. If the assumption of  
308 sphericity was violated, degrees of freedom were corrected according to Greenhouse-Geisser, and  
309 adjusted *p*-values are reported. Effect sizes are reported as partial eta squared ( $\eta^2_p$ ), Cohen's *d*, or  
310 Pearson's correlation coefficient *r*, respectively. Analyses were run in MATLAB R2019a (The  
311 Mathworks, Inc.) and IBM SPSS Statistics for Windows (Version 25.0).

## 312 **2.6 Electroencephalographic data analysis**

313 Data were response-locked and averaged for each participant, separately for the following  
314 categories: a) errors and correct responses (across confidence levels), b) errors ('low confidence'  
315 and 'higher confidence'), and c) correct ('high confidence' and 'lower confidence'). Error trials  
316 rated as 'surely wrong' were termed 'low confidence'; error trials which received any higher

317 confidence rating were termed ‘higher confidence’ (and vice versa for correct trials). The reason  
318 for aggregating the trials in this way rather than using three levels as for the behavioural analyses  
319 was that errors were most often associated with a ‘surely wrong’ and correct trials with a ‘surely  
320 correct’ rating, causing trial numbers for the other three rating categories to be too low to be  
321 included as separate categories of interest (note that because of data cleaning, typically less trials  
322 are available for the analysis of ERP data).

323         The  $N_{e/c}$  local peak amplitude was extracted from the response-locked data from the interval  
324 0 to 150 ms following the response at FCz, and the  $P_{e/c}$  local peak amplitude was extracted from  
325 the interval 150 to 350 ms at Cz based on conventions and visual inspection of the local maxima  
326 of the grand-average scalp topographies (Falkenstein et al., 2000; Siswandari et al., 2019).

327         Only data sets with a minimum of six trials in each condition of the respective comparison  
328 were used for statistical analyses (Pontifex et al., 2010). To maximise the number of data-sets  
329 available for each analysis of interest, three subgroups of participants were used: Subgroup 1  
330 included 63 participants and was used to examine the effect of accuracy and age on the ERP  
331 amplitudes for pooled trials. In addition, we ran focussed control analyses on two smaller  
332 subgroups of participants who had a sufficient number of trials to investigate modulations by  
333 confidence across the lifespan separately for errors (Subgroup 2,  $N = 44$ ) and correct responses  
334 (Subgroup 3,  $N = 51$ ). For the latter analyses, we ensured that participants’ age was still well-  
335 distributed across all decades within the subgroups, and that age similarly affected the main  
336 behavioural parameters as in the full sample (see supplementary material S1).

337         For statistical analyses of ERP peak amplitudes, we also employed one-way repeated  
338 measures ANCOVAs with age as the covariate of interest. For Subgroup 1, the dependent variables  
339 were the CSD-transformed  $N_e$  and  $N_c$  as well as  $P_e$  and  $P_c$ , amplitudes with accuracy (error, correct)  
340 as the within-subject factor (see supplementary material S2 for the analysis with the within-subject

341 factor confidence). For Subgroup 2 (including only errors), the dependent variables were  $N_e$  and  
342  $P_e$ , and the within-subject factor was confidence ('surely wrong', 'higher confidence'), and lastly,  
343 for Subgroup 3 (including only correct responses), the dependent variables were  $N_c$  and  $P_c$ , and the  
344 within-subject factor was again confidence; however, with different levels ('surely correct', 'lower  
345 confidence').

346

### 347 **3. Results**

348 Only significant effects in the ANCOVAs and relevant follow-up tests are reported in this  
349 section. For results of all tests, please refer to supplementary Tables S1-S4. Note that all computed  
350 ANCOVAs included age as the covariate of interest.

#### 351 **3.1 Behavioural results**

##### 352 **3.1.1 Attention**

353 The average score for sustained attention and processing speed as assessed by the d2-test  
354 was  $178.5 \pm 5.6$  ( $M \pm SEM$ ) and showed the typical decline for older adults, as shown by a  
355 significant correlation between test scores and age [ $r(63) = -.553, p < .001$ ].

##### 356 **3.1.2 Distribution of confidence ratings**

357 In a first step, we were interested in how the confidence ratings were distributed across the  
358 four confidence levels across the lifespan (Figure 2). For this, we ran two Friedman ANOVAs for  
359 dependent measures for the percentages for each rating category, separately for errors and correct  
360 responses.

361 The ANOVA for errors showed that the percentages differed between confidence levels  
362 [ $\chi^2(3) = 78.029, p < .001$ ]. On average, most errors were rated as 'surely wrong' (42.8 %) and the  
363 smallest proportion of errors as 'maybe wrong' (7.3%). Interestingly, follow-up correlation  
364 analyses between age and percentage for each rating category showed that the proportion of 'maybe



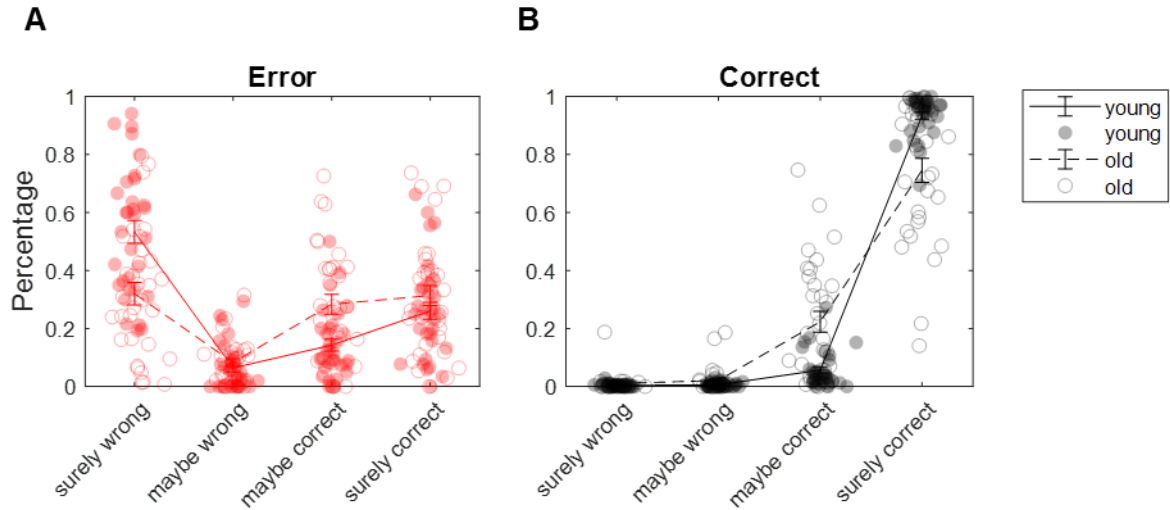

365  
366 *Figure 2.* Distribution of confidence ratings for errors (red; A) and correct responses (black; B).  
367 Errors were most often rated as ‘surely wrong’, and correct responses as ‘surely correct’. Dots  
368 represent the individual proportion of the particular confidence response amongst all errors or  
369 correct responses, respectively. A median split by age ( $Mdn = 46$ ) was conducted for illustration  
370 purposes. Filled dots and solid lines represent younger adults, empty circles and dashed lines  
371 represent older adults. With increasing age, participants used the ‘surely correct/wrong’ ratings  
372 less, but more the middle of the confidence scale.

373  
374 correct’ ratings (21.0%) was increased with higher age [ $r(63) = .450, p < .001$ ], whereas the ratio  
375 of ‘surely wrong’ ratings was decreased [ $r(63) = -.543, p < .001$ ; all other correlations *ns*; Figure  
376 2A].

377 For correct responses (Figure 2B), the ANOVA also revealed a main effect of confidence  
378 [ $\chi^2(3) = 167.472, p < .001$ ]. Correct responses were most often rated as ‘surely correct’ (84.2 %) and  
379 least often as ‘surely wrong’ (0.7 %). Again, correlation analyses between age and percentage  
380 within each confidence category showed that the proportion of ‘maybe correct’ ratings (13.8%)

381 was increased with higher age [ $r(63) = .530, p < .001$ ], and was decreased for ‘surely correct’  
382 ratings [ $r(63) = -.532, p < .001$ ]; all other correlations *ns*].

383 As mentioned above, to ensure a sufficient number of trials for each level of confidence for  
384 each participant, we combined ‘maybe wrong’ and ‘maybe correct’ ratings into one category  
385 representing ‘unsure’ responses. Thus, for all following behavioural analyses including the factor  
386 confidence, the reported analyses use three confidence levels.

### 387 **3.1.3 Error rate (ER)**

388 The average error rate was  $15.6 \pm 1.6\%$  and significantly increased with higher age [ $r(63)$   
389  $= .594, p < .001$ ]. The ANCOVA for error rate with the within-subject factor confidence revealed  
390 a main effect of confidence [ $F(2,124) = 97.426, p < .001, \eta^2_p = .611$ ]. The error rate decreased  
391 across confidence levels from  $92.1 \pm 1.4\%$  on trials rated as ‘surely wrong’ to  $34.7 \pm 2.6\%$  on  
392 trials rated as ‘unsure’ and  $8.1 \pm 1.4\%$  on trials rated as ‘surely correct’. This showed that, on  
393 average, participants’ confidence reflected their performance reasonably well (which further  
394 supports the notion that the current study’s confidence scale was a meaningful assessment tool).  
395 Furthermore, the ANCOVA revealed a significant interaction between confidence and age  
396 [ $F(2,124) = 5.264, p = .009, \eta^2_p = .078$ ]. In subsequent correlation analyses between error rate and  
397 age for each level of confidence, a higher error rate with older age was only found for the ‘surely  
398 correct’ confidence level [ $r(63) = .568, p < .001$ ]; both other correlations *ns*].

### 399 **3.1.4 Response time (RT)**

400 An ANCOVA for mean RT with the within-subject factor accuracy showed the expected  
401 slowing with age [ $F(1,63) = 18.164, p < .001, \eta^2_p = .224$ ]; correlation between age and RT:  $r(63) =$   
402  $.534, p < .001$ ] and a significant main effect of accuracy [ $F(1,63) = 4.188, p = .045, \eta^2_p = .062$ ]. A  
403 follow-up *t*-test revealed that errors ( $733.4 \pm 13.9$  ms) were on average slower than correct

404 responses [ $709.1 \pm 11.5$  ms;  $t(64) = 2.937, p = .005, d = 0.364$ ]. The interaction between accuracy  
405 and age was not significant.

406 The age-related slowing was similarly present as a main effect of age in the ANCOVA with  
407 the within-subject factor confidence [ $F(1,57) = 19.159, p < .001, \eta^2_p = .252$ ; Figure 4A]. Moreover,  
408 the ANCOVA revealed a main effect of confidence [ $F(2,114) = 13.132, p < .001, \eta^2_p = .187$ ] and  
409 a significant interaction between confidence and age [ $F(2,114) = 3.793, p = .030, \eta^2_p = .062$ ].  
410 Planned follow-up *t*-tests showed that trials associated with the ‘unsure’ confidence level ( $805.4 \pm$   
411  $15.0$  ms) were significantly slower than trials rated as ‘surely correct’ [ $700.0 \pm 11.7$  ms;  $t(58) =$   
412  $9.198, p < .001, d = 1.198$ ] or ‘surely wrong’ [ $725.2 \pm 16.9$  ms;  $t(58) = -5.236, p < .001, d = 0.682$ ].  
413 Furthermore, trials with the extreme ratings [‘surely wrong’:  $r(57) = .502, p < .001$ ; ‘surely correct’:  
414  $r(57) = .567, p < .001$ ], but not with ‘unsure’ ratings, were significantly slower with older age.

415 In short, RT was associated with confidence, such that high certainty (i.e., ‘surely  
416 correct/wrong’) was associated with the fastest responses, and this difference decreased with higher  
417 age.

### 418 **3.1.5 Confidence**

419 A repeated measures ANCOVA examining mean confidence ratings (coded from 1 to 3,  
420 i.e., ‘surely wrong’, ‘unsure’, and ‘surely correct’) across all trials revealed a main effect of  
421 accuracy [i.e., error vs. correct trials;  $F(1,63) = 164.008, p < .001, \eta^2_p = .722$ ] and a significant  
422 interaction between accuracy and the covariate age [ $F(1,63) = 37.433, p < .001, \eta^2_p = .373$ ]. The  
423 average confidence rating was lower for errors ( $1.861 \pm 0.047$ ) compared to correct responses  
424 ( $2.836 \pm 0.026$ ), as confirmed in a follow-up *t*-test [ $t(64) = -16.774, p < .001, d = 2.081$ ]. Separate  
425 follow-up correlation analyses between confidence and age for each accuracy level separately  
426 (error, correct) showed that the mean confidence for errors was increased with higher age [ $r(63) =$

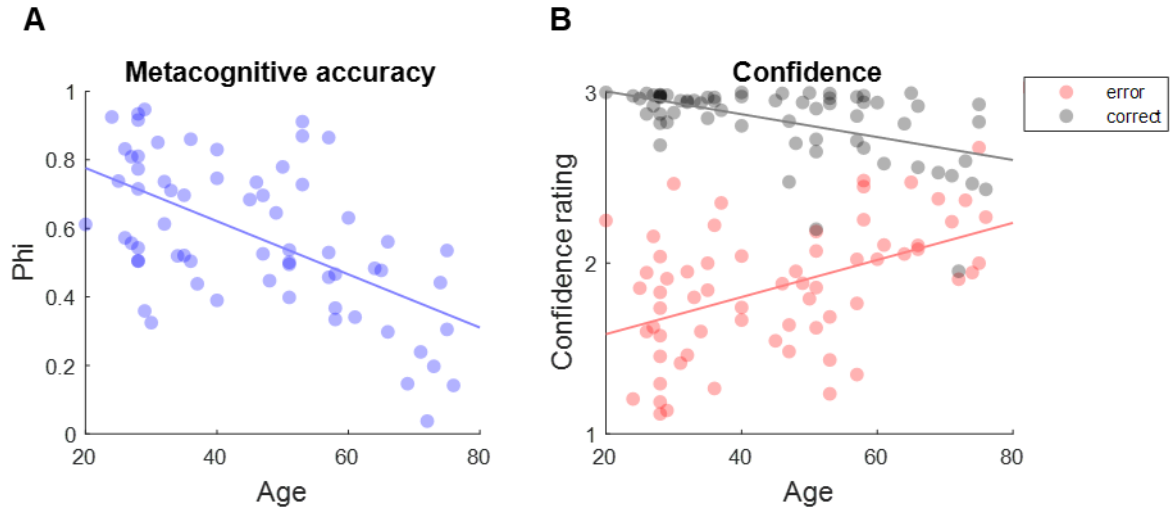

427  
428 *Figure 3. Metacognition across the lifespan. (A) Metacognitive accuracy (Phi) decreased with age.*  
429 *(B) Mean confidence ratings of errors correlated significantly positively with age, while mean*  
430 *confidence ratings of correct trials correlated significantly negatively. Dots represent means of*  
431 *individual participants.*

432  
433 *.471,  $p < .001$ ], while the mean confidence was decreased with higher age for correct responses*  
434 *[ $r(63) = -.523, p < .001$ ; Figure 3B].*

### 435 **3.1.6 Metacognitive accuracy (Phi)**

436 Phi had a mean of  $0.579 \pm 0.027$  across the entire sample and correlated negatively with  
437 age, indicating a decrease of metacognitive accuracy with age [ $r(63) = -.582, p < .001$ ; Figure 3A].  
438 Moreover, we computed a partial correlation between Phi and age while controlling for error rate,  
439 which still showed a decrease of Phi with age [ $r(60) = -.343, p = .005$ ], suggesting that changes in  
440 metacognitive accuracy with age were not due to individual differences in task performance.  
441 Similarly, a partial correlation controlling for the individual d2-test scores (which provide a task-  
442 independent measure of attention) suggested that the decrease in Phi with age was also independent  
443 of an age-related reduction in attentional capacity [ $r(60) = -.487, p < .001$ ].

### 444 **3.1.7 Behavioural adaptation**

445 To investigate the effect of accuracy and confidence in a given trial on the behaviour in the  
446 following trial, we computed response caution as the product of individual percentage correct and  
447 median RT in the subsequent trial. The ANCOVA with the within-subject factor accuracy  
448 (referring to the previous trial) revealed a main effect of accuracy [ $F(1,63) = 6.929, p = .011, \eta^2_p =$   
449  $.099$ ] but no main effect of age, nor a significant interaction. The main effect was confirmed in a  
450 follow-up  $t$ -test between errors and correct responses [ $t(64) = 2.950, p = .004, d = 0.357$ ]. These  
451 findings indicate that participants were on average more cautious after errors than after correct  
452 responses, and this effect was independent of age.

453 Next, we examined whether the response caution in the subsequent trial could also be  
454 modulated by confidence. As shown above, confidence and accuracy are strongly correlated;  
455 however, a significant modulation by confidence could also indicate that this internal confidence  
456 signal drives behavioural adaptations (Figure 4B). The ANCOVA with the within-subject factor  
457 confidence (referring to the previous trial) revealed a trend for a main effect of confidence  
458 [ $F(2,110) = 2.897, p = .059, \eta^2_p = .050$ ], but again, no main effect of age, nor a significant  
459 interaction. Follow-up  $t$ -tests between the confidence levels showed that the response caution after  
460 trials rated as ‘surely correct’ was significantly lower compared to trials rated as ‘unsure’ [ $t(56) =$   
461  $3.448, p = .001, d = 0.457$ ] or as ‘surely wrong’ [ $t(56) = 3.066, p = .003, d = 0.406$ ].

462 To summarise the effects of ageing on behaviour, we found the expected age-related general  
463 increase in error rates and response times, accompanied by a decrease in metacognitive ability,  
464 which was mainly reflected in reduced use of confidence ratings at the extreme ends of the scale  
465 but more indications of being unsure. Response caution, on the other hand, was not affected by  
466 ageing. Caution increased after errors compared to correct responses, and notably, tended to be

467

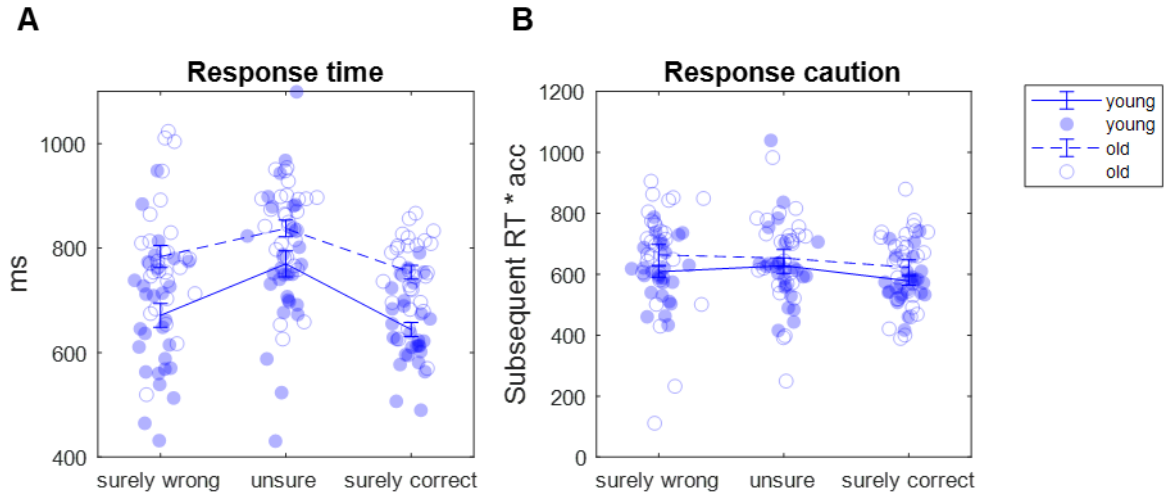

468  
469 *Figure 4.* Modulation of response time (RT; A) and response caution (B) by confidence.

470 Participants were split into a younger and an older group relative to the median ( $Mdn = 46$ ) for  
471 illustration purposes. Filled dots and solid lines represent younger adults, empty circles and dashed  
472 lines represent older adults. (A) Trials rated as ‘unsure’ showed slower RTs than trials associated  
473 with a ‘surely’ rating, and this difference was smaller with increasing age. (B) Adaptation of  
474 response caution depending on previous trial confidence rating. Response caution was computed  
475 as the product of individual average accuracy and RT of subsequent trials.

476  
477 specifically modulated by previous trial confidence. With higher confidence, the response caution  
478 in the subsequent trial decreased.

### 479 **3.2 Electrophysiological results**

#### 480 **3.2.1 $N_{e/c}$ amplitudes**

481 The peak amplitude of the  $N_{e/c}$  was significantly larger for errors compared to correct  
482 responses, as reflected in a main effect of accuracy in the ANCOVA with the within-subject factor  
483 accuracy and the covariate of interest age [ $F(1,61) = 15.209, p < .001, \eta^2_p = .200; t(62) = -4.544, p$   
484  $< .001, d = 0.572$ ; Figure 5A & B]. A main effect of age revealed smaller amplitudes with older  
485 age [ $F(1,61) = 5.999, p = .029, \eta^2_p = .076$ ], and an interaction between accuracy and age showed

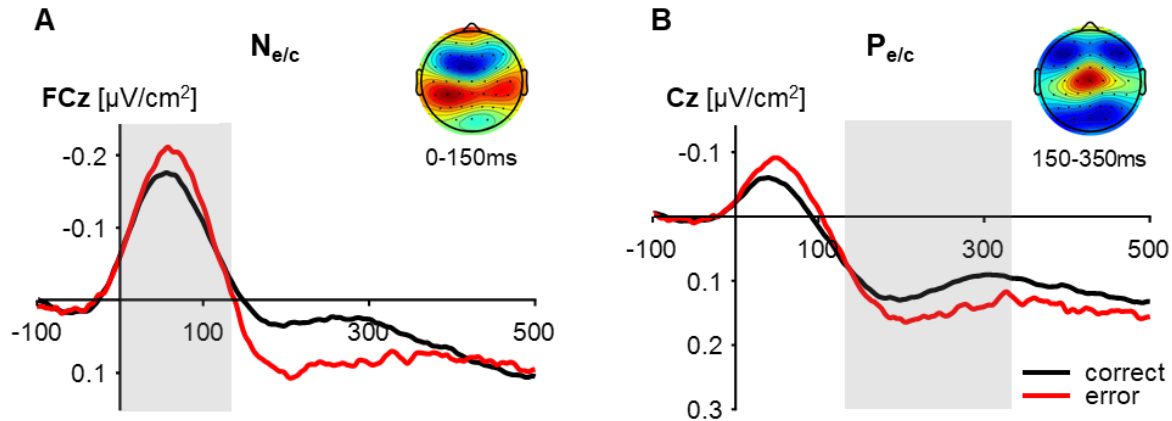

486  
487 *Figure 5.* Response-locked event-related potentials for errors and correct responses and  
488 topographical maps of errors ( $N = 63$ ; A, B) after current source density transformation. (A)  $N_{e/c}$  is  
489 computed at electrode FCz and (B)  $P_{e/c}$  at electrode Cz. Errors are shown in red, correct trials in  
490 black. Scalp topographies depict the mean activity for all error trials averaged across the time  
491 windows for the  $N_e$  (0-150 ms) and the  $P_e$  (150-350 ms). Grey squares indicate time windows for  
492 the analysis of peak amplitudes for the respective components.

493  
494 that the age effect differed between errors and correct responses [ $F(1,61) = 5.999, p = .017, \eta^2_p =$   
495  $.090$ ]. Follow-up correlation analyses between the  $N_e$  and  $N_c$  amplitude and age, separately for  
496 errors and correct responses, confirmed that the  $N_e$  [ $r(61) = .326, p = .009$ ], but not the  $N_c$  amplitude  
497 was reduced with higher age.

498 For the analysis of confidence, we ran separate ANCOVAs for errors and correct responses  
499 on  $N_e$  and  $N_c$  amplitude, respectively. Confidence served as the within-subject factor, but was  
500 collapsed into two levels (error: ‘surely wrong’, ‘higher confidence’; correct: ‘surely correct’,  
501 ‘lower confidence’; see Methods). The ANCOVA for errors showed a main effect of age [ $F(1,42)$   
502  $= 10.787, p = .002, \eta^2_p = .204$ ], but the main effect of confidence failed to reach significance  
503 [ $F(1,42) = 3.461, p = .070, \eta^2_p = .076$ ]. No significant interaction was found (Figure 6A). Follow-

504 up  $t$ -tests showed that  $N_c$  amplitudes were indeed larger for errors of low confidence compared to  
505 higher confidence [ $t(43) = -2.309, p = .026, d = 0.348$ ].

506 The ANCOVA for correct responses with the within-subject factor confidence yielded a significant  
507 effect of confidence [ $F(1,49) = 12.624, p = .001, \eta^2_p = .205$ ]. The  $N_c$  was not modulated by age,  
508 but we found a significant interaction between confidence and age [ $F(1,49) = 7.746, p = .008, \eta^2_p$   
509  $= .136$ ; Figure 6B]. The main effect was driven by smaller  $N_c$  amplitudes after correct responses  
510 rated as ‘surely correct’ compared to those with lower confidence, as reflected in a significant  
511 follow-up  $t$ -test [ $t(50) = -2.699, p = .009, d = 0.438$ ]. Follow-up correlation analyses pointed to an  
512 age-related decrease in  $N_c$  amplitude on correct trials with lower confidence ratings [ $r(49) = .278,$   
513  $p = .048$ ], but not when they were rated as ‘surely correct’ (Figure 6C).

### 514 3.2.2 $P_{e/c}$ amplitudes

515 The ANCOVA for the  $P_{e/c}$  with the within-subject factor accuracy revealed a significant  
516 main effect for accuracy with larger amplitudes for errors compared to correct responses [ $F(1,61)$   
517  $= 23.886, p < .001, \eta^2_p = .281; t(62) = 4.507, p < .001, d = 0.568$ ; Figure 5C & D]. There was no  
518 main effect for age, but a significant interaction between confidence and age [ $F(1,61) = 11.836, p$   
519  $= .001, \eta^2_p = .163$ ]. Follow-up correlation analyses for errors and correct responses found no  
520 significant correlation between the amplitude and age for correct responses; however, the age-  
521 related decrease in amplitude for errors marginally missed the significance threshold [ $r(61) = -.237,$   
522  $p = .061$ ].

523 Next, responses were again split by their accuracy, and separate ANCOVAs were  
524 conducted with the within-subject factor confidence. The ANCOVA for errors did not yield any  
525 significant effects on the  $P_e$  amplitude (Figure 6D). However, due to previous evidence of a strong  
526 relation between  $P_{e/c}$  amplitude and error detection or confidence ratings (Boldt and Yeung, 2015;  
527 Nieuwenhuis et al., 2001), we performed an exploratory  $t$ -test comparing the  $P_e$  amplitudes



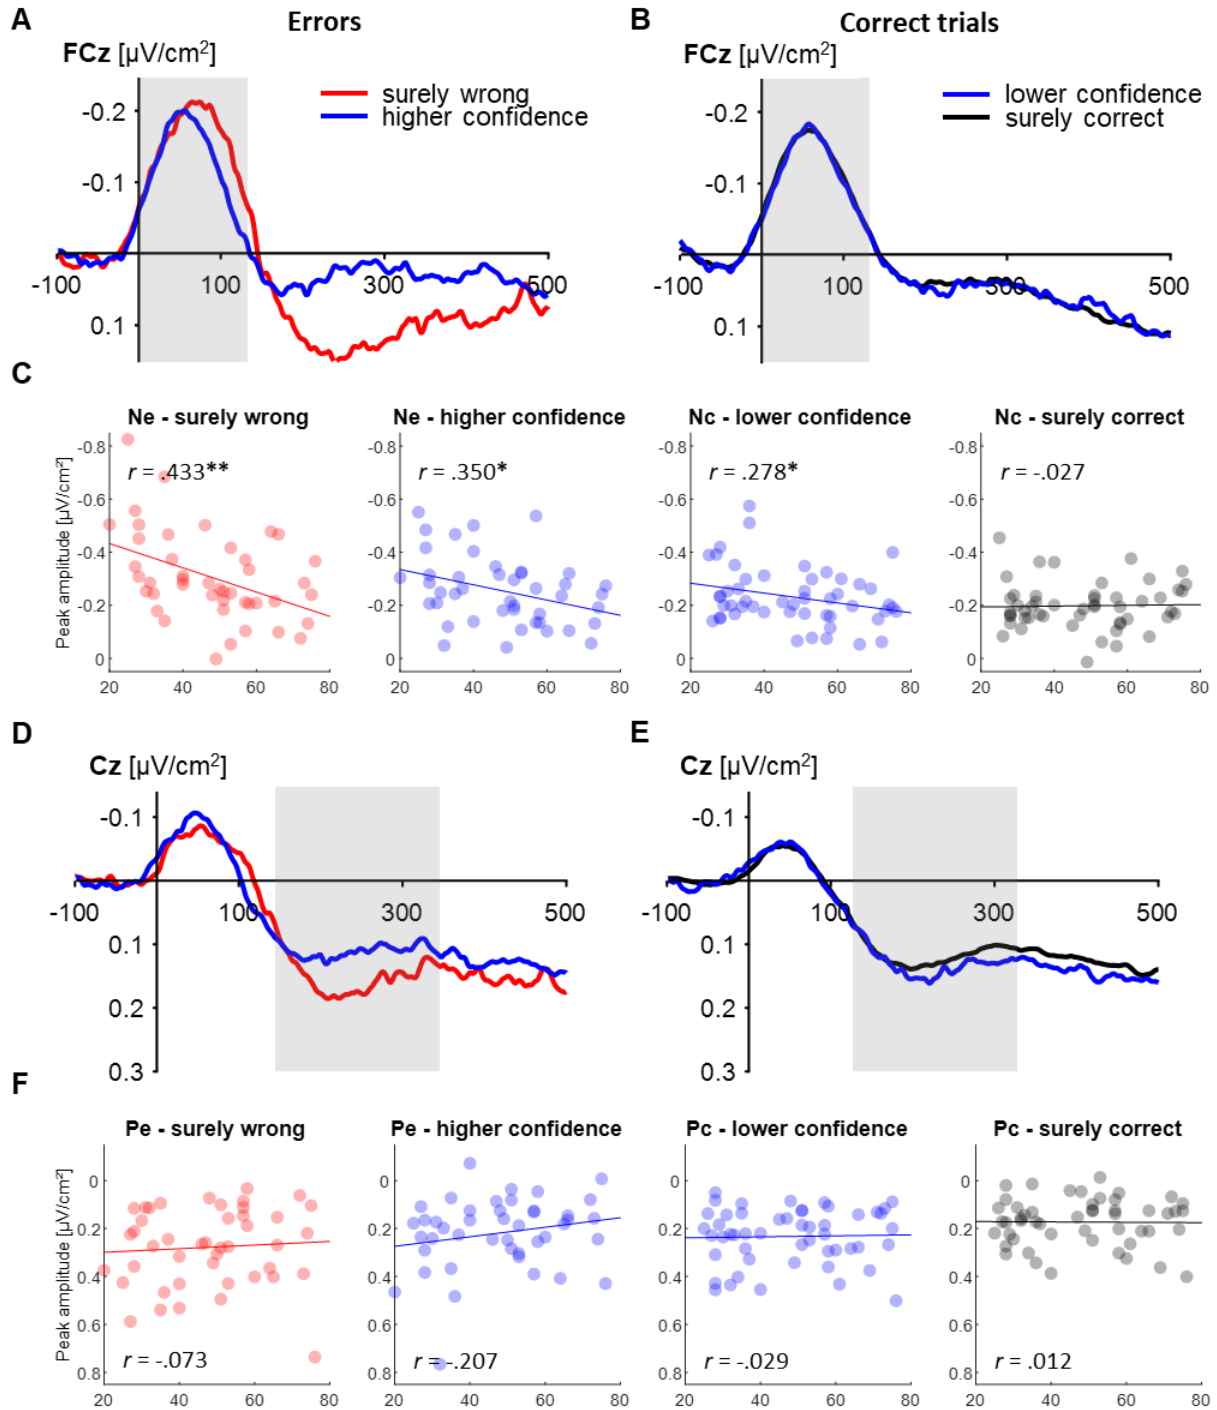

528  
529 *Figure 6.* Response-locked event-related potentials, separately for errors and correct responses  
530 after current source density transformation. Errors are shown in the left panel, correct trials in the  
531 right panel. For errors ( $N = 44$ ), data are binned into trials rated as ‘surely wrong’ (red) and trials  
532 rated with any higher confidence (blue). The  $N_e$  (A) and  $N_c$  (B) are shown at electrode FCz and did

533 not differ between confidence levels, and  $P_e$  (D) and  $P_c$  (E) are shown at electrode Cz and were  
534 both increased for the trials associated with lower confidence, respectively. (C) and (F) illustrate  
535 the correlations between age and the ERP components, separately for errors, correct trials, and  
536 confidence levels. The amplitudes of the  $N_e$  (both confidence levels) and the  $N_c$  (only ‘lower  
537 confidence’) decreased with age, while there was no significant correlation between age and any  
538 of the  $P_{e/c}$  amplitudes. Dots represent individual average peak amplitudes.

539 \* $p < .05$ . \*\* $p < .01$ . \*\*\* $p < .001$

540  
541 between the two confidence levels. Indeed, we found a significant difference between ‘surely  
542 wrong’ and ‘higher confidence’ errors [ $t(43) = 2.157, p = .037, d = 0.325$ ], suggesting that the  $P_e$   
543 was only modulated by confidence, if assessed independent of age.

544 The ANCOVA for correct trials, in contrast, revealed a main effect of confidence [ $F(1,49)$   
545 = 5.065,  $p = .029, \eta^2_p = .094$ ], and follow-up  $t$ -tests showed that the peak amplitude was on average  
546 higher for correct responses with lower confidence compared to those rated as ‘surely correct’  
547 [ $t(50) = 5.838, p < .001, d = 0.818$ ; Figure 6E]. Again, there was no effect of age on  $P_c$  amplitude,  
548 neither as a main effect, nor as an interaction.

549

#### 550 **4. Discussion**

551 We conducted a complex four-choice flanker task with adult participants covering an age  
552 range from 20 to 76 years, allowing us to investigate confidence and metacognitive accuracy as  
553 well as neural indices thereof across the lifespan. We found that error rates and response times  
554 (RT) increased with age. Metacognitive accuracy, quantified as Phi, gradually decreased across the  
555 lifespan and was characterised by differential use of confidence ratings. In contrast, we did not find  
556 differences between younger and older adults in the ability to adapt behaviour in accordance with

557 reported confidence. As expected, the  $N_{e/c}$  and  $P_{e/c}$  amplitudes declined with higher confidence.  
558 While the  $N_{e/c}$  amplitude was smaller with older age whenever participants were not entirely certain  
559 about their response accuracy, the variation in the  $P_{e/c}$  amplitude with reported confidence was  
560 surprisingly not affected by ageing. In the following, we will first discuss potential processes  
561 underlying age-related differences in metacognitive accuracy and their relation to task performance  
562 and confidence, before comparing the pattern we observed at the behavioural level to the patterns  
563 we observed in the ERPs. Finally, we argue that older adults' preserved ability to adapt their  
564 behaviour to their perceived confidence could be related to the  $P_{e/c}$  amplitude.

#### 565 **4.1 Differential use of confidence scale as a marker of age-related metacognitive decline**

566 In the present study, metacognitive accuracy ( $\Phi$ ) was reduced with increasing age. This  
567 is consistent with the findings of Palmer et al. (2014) who used a metacognitive efficiency measure,  
568 which further considered the individual performance in their perceptual discrimination task. As  
569 this measure was not directly applicable in our four-choice flanker task, we confirmed (by  
570 calculating partial correlations taking into account the error rate and the d2-test score) that the  
571 observed decline in metacognitive accuracy was not merely a reflection of general age-related  
572 performance or attention deficits (d2-test; see also Larson & Clayson, 2011). Our results, therefore,  
573 show that Palmer et al.'s (2014) findings also hold for a more complex, speeded decision task,  
574 which was not based on stimulus ambiguity.

575 The question remains as to how the age-related differences in confidence emerge. Given  
576 the nature of  $\Phi$ , a smaller value could either indicate more 'misclassifications', or a general  
577 response tendency towards the middle (i.e., rating all correct responses as 'maybe correct' will  
578 result in a lower  $\Phi$  value than rating the same number of correct responses as 'surely correct').  
579 Indeed, we observed that older adults used the extreme ends of the confidence scale considerably  
580 less often than younger adults.

581 For errors, this pattern resulted in a higher mean confidence with age. This disproportional  
582 rise in reported confidence has similarly been shown in error detection studies, indicated by a lower  
583 error detection rate in older adults (Harty et al., 2017, 2013; Niessen et al., 2017).

584 For correct decisions, in contrast to previous studies that reported an *over*-confidence in  
585 older age (Dodson et al., 2007; Hansson et al., 2008; Ross et al., 2012), we observed *lower* mean  
586 confidence due to the tendency of the older adults to use the middle of the confidence scale more  
587 often. These findings emphasise the actual difficulties of older adults in evaluating their  
588 performance and establishing confidence. In our study, the (relatively) high task difficulty might  
589 be a reason for these difficulties. Stahl et al. (2020) showed that their slow errors, which were  
590 associated with a weak stimulus-response representation (i.e., due to a weak memory), were  
591 associated with lower confidence than fast, impulsive responses. Thus, assuming that the present  
592 task posed higher demands on the older adults (as indicated, for instance, by higher error rates),  
593 their impaired metacognitive evaluation might partly be related to more frequent memory-related  
594 errors, which appear to be more challenging to assess consciously (Maier and Steinhauser, 2017;  
595 Stahl et al., 2020).

#### 596 **4.2 Neural correlate of confidence is stable across age**

597 The  $P_{e/c}$  is an established marker of metacognition, reflecting variations in subjective error  
598 awareness and decision confidence (Boldt and Yeung, 2015; Nieuwenhuis et al., 2001). In the  
599 present study, the  $P_{e/c}$  showed the well-known accuracy effect of larger amplitudes for errors than  
600 correct responses. Moreover, we could replicate prior findings of the  $P_{e/c}$  increasing with decreasing  
601 confidence, - for the first time - for a very broad age range (Boldt and Yeung, 2015; Rausch et al.,  
602 2019). The modulation of the  $P_e$  of errors by confidence also replicates findings from error detection  
603 studies showing increased  $P_e$  amplitudes for detected compared to undetected errors (Endrass et  
604 al., 2012a; Nieuwenhuis et al., 2001).

605 The main interest of our study was to investigate the modulation of the  $P_{e/c}$  by  
606 metacognition in the context of healthy ageing. Remarkably, the  $P_{e/c}$  amplitude did not show an  
607 overall reduction with age, nor a differential modulation by confidence across the lifespan,  
608 suggesting that the accumulation of error evidence was well preserved in older age. This is contrary  
609 to the error detection literature (Harty et al., 2017; Niessen et al., 2017). Since these studies did not  
610 assess confidence on multiple levels, participants did not have the chance to express uncertainty.  
611 Assuming more ‘unsure’ cases with older age, their observed age-related decrease in  $P_e$  amplitude  
612 for detected errors might thus be confounded, as higher uncertainty was generally associated with  
613 reduced  $P_e$  amplitudes (Boldt and Yeung, 2015). Following this logic, it is also possible to explain  
614 the lack of a significant age-related modulation of the  $P_{e/c}$  amplitude in the present study: If older  
615 adults’ internal threshold for rating an error as ‘surely wrong’ was generally raised, the errors that  
616 *were* rated as ‘surely wrong’ should be trials with particularly high  $P_e$  amplitudes, as they were  
617 absolutely sure of having committed an error. As a result, a putative age-related decrease in the  $P_e$   
618 amplitude of low confidence errors could be masked in our data, because the same reported rating  
619 levels might reflect a different sense of confidence for younger and older adults. Thus, the current  
620 pattern of results suggests that the  $P_{e/c}$  amplitude does *not* serve as a direct index of metacognitive  
621 accuracy across participants, but rather reflects the degree of confidence, irrespective of objective  
622 performance (Di Gregorio et al., 2018; Larson and Clayson, 2011; Pouget et al., 2016; Stahl et al.,  
623 2020).

#### 624 **4.3 Impaired neural processing of conflict modulates metacognitive decline**

625 The marked behavioural decline in older adults’ metacognitive accuracy was not mirrored  
626 in age-related variations of the  $P_{e/c}$  amplitude, but rather in a differential modulation of the  $N_{e/c}$   
627 across the lifespan. The control analyses revealed that the  $N_{e/c}$  amplitude was also affected by the  
628 interaction between confidence and age. With older age, the  $N_{e/c}$  declined for all trial types in which

629 some degree of conflict was perceived. In other words, only the  $N_c$  of correct trials that were rated  
630 as ‘surely correct’ showed no amplitude variations across the lifespan. As the  $N_{e/c}$  is sensitive to  
631 conflict between the given and the actual correct response, older adults seemed to having had  
632 difficulties internally representing the correct response in any conflicting situation (Yeung et al.,  
633 2004).

634 We suggest that the reduced  $N_{e/c}$  amplitude of perceived errors with higher age could be  
635 related to the observed decrease in metacognitive accuracy in our flanker task. If older adults had  
636 difficulties forming an accurate internal representation of the correct response, this information  
637 was necessarily missing for the metacognitive evaluation. Thus, the impaired neural integration of  
638 conflict detection and confidence could have led to the observed behavioural difficulties matching  
639 confidence ratings and objective accuracy.

#### 640 **4.4 Adults of all ages base future behaviour on subjective confidence**

641 Ultimately, proper metacognitive evaluation should improve behaviour. Interestingly,  
642 response caution was not only enhanced after errors, but we also found some (limited) evidence  
643 that it was modulated by the reported confidence in the preceding trial. Given that the participants  
644 did not receive any external feedback about the accuracy of their response (as it is often the case in  
645 real-life decisions), it seems plausible that they used their best available estimate, i.e., the subjective  
646 sense of confidence, to regulate subsequent behaviour (Desender et al., 2019a). Specifically,  
647 medium and low confidence about a choice was associated with higher response caution in the  
648 subsequent trial. Possibly, participants sought more evidence before committing to their next  
649 decision, leading to slower but more accurate responses (Desender et al., 2019a, 2019b).

650 Translating our findings to error detection studies, the increase in response caution with  
651 lower previous trial confidence converges with findings of error detection studies reporting  
652 increased slowing (i.e., a sign of behavioural adaptation) after detected compared to undetected

653 errors (Nieuwenhuis et al., 2001; Stahl et al., 2020; Wessel et al., 2018; for a review on post-error  
654 adjustments see Danielmeier & Ullsperger, 2011).

655 Notably, response caution was similarly affected by accuracy and confidence across the  
656 lifespan. Thus, while metacognitive accuracy was reduced in older age, a neural correlate of  
657 confidence magnitude, the  $P_{e/c}$  amplitude, and the behavioural adaptations relative to the reported  
658 confidence were consistent across the lifespan. This suggests that it is not metacognitive accuracy  
659 per se, but rather the perceived confidence that shapes future behaviour: Despite their failure in  
660 matching confidence to task performance, older adults seem to be equally able to use internal states  
661 of confidence to change future behaviour adaptively.

#### 662 **4.5 Limitations and implications**

663 One limitation of the present study is the confined number of trials available for analysis  
664 after defining conditions of interest. Due to an unforeseen highly skewed use of the confidence  
665 scale, it was impossible to apply a factorial design while retaining four distinct confidence levels.  
666 In particular for correct trials, the variance in confidence ratings was low, which is a common  
667 problem in metacognition research (for a review, see Wessel, 2012).

668 A second shortcoming is the number of participants retained for the analyses. When  
669 designing the experiment, we tried to find an optimal balance between task difficulty, feasibility  
670 for all ages, and gaining many trials while ensuring that especially older adults were not exhausted  
671 at the end of the experiment. However, the combination of a substantial number of response  
672 alternatives, time pressure, and discriminability of stimuli was demanding, leading to an  
673 undesirably large number of participants to be excluded from the analyses.

674 Nevertheless, our findings provide important insights into ageing effects on metacognition,  
675 integrating approaches from error detection and decision confidence research. In contrast to the  
676 metacognitive evaluation itself, the effect of confidence on subsequently adapting response caution

677 was well preserved in older adults. Thus, training the metacognitive evaluation of fundamental  
678 decisions in older adults might constitute a promising endeavour (and has been shown to work for  
679 mathematical problem solving [Pennequin et al., 2010]).

## 680 **5. Conclusion**

681 The study of error detection and confidence in the context of healthy ageing have advanced  
682 largely in parallel. Our study demonstrates that confidence shapes our behavioural and neural  
683 processing of decisions and should be considered to investigate age-related effects on error  
684 processing and metacognitive abilities. Interestingly, the  $N_{e/c}$ , but not the  $P_{e/c}$  amplitude was  
685 differentially modulated by confidence across the lifespan, suggesting that the decreasing accuracy  
686 of metacognitive judgements with older age might be related to impaired integration of neural  
687 correlates of conflict detection and decision confidence.

688

## 689 **Acknowledgements**

690 We thank all colleagues from the Institute of Neuroscience and Medicine (INM-3),  
691 Cognitive Neuroscience, and the Decision Neuroscience Lab at the Melbourne School of  
692 Psychological Sciences for valuable discussions and their support.

693

## 694 **Disclosure statement**

695 The authors declare no conflict of interest.

696



697 **References**

- 698
- 699 Boldt, A., Yeung, N., 2015. Shared neural markers of decision confidence and error detection. *J.*
- 700 *Neurosci.* 35, 3478–3484. <https://doi.org/10.1523/JNEUROSCI.0797-14.2015>
- 701 Brickenkamp, R., 2002. *The d2 Test of attention.* (1st ed.), 9th ed. Verlag für Psychologie
- 702 Hogrefe, Goettingen.
- 703 Castel, A.D., Middlebrooks, C.D., McGillivray, S., 2016. Monitoring Memory in Old Age:
- 704 Impaired, Spared, and Aware., in: Dunlosky, J., Tauber, S.K. (Eds.), *The Oxford Handbook*
- 705 *of Metamemory.* Oxford University Press, pp. 519–534.
- 706 <https://doi.org/10.1093/oxfordhb/9780199336746.013.3>
- 707 Chua, E., Schacter, D.L., Sperling, R., 2009. Neural basis for recognition confidence. *Psychol.*
- 708 *Aging* 24, 139–153. <https://doi.org/10.1037/a0014029>.Neural
- 709 Clawson, A., Clayson, P.E., Keith, C.M., Catron, C., Larson, M.J., 2017. Conflict and
- 710 performance monitoring throughout the lifespan: An event-related potential (ERP) and
- 711 temporospatial component analysis. *Biol. Psychol.* 124, 87–99.
- 712 <https://doi.org/10.1016/j.biopsycho.2017.01.012>
- 713 Danielmeier, C., Ullsperger, M., 2011. Post-error adjustments. *Front. Psychol.* 2, 1–10.
- 714 Delorme, A., Makeig, S., 2004. EEGLAB: an open source toolbox for analysis of single-trial
- 715 EEG dynamics including independent component analysis. *J. Neurosci.* 134, 9–21.
- 716 Desender, K., Boldt, A., Verguts, T., Donner, T.H., 2019a. Confidence predicts speed-accuracy
- 717 tradeoff for subsequent decisions. *Elife.* <https://doi.org/10.1101/466730>
- 718 Desender, K., Murphy, P.R., Boldt, A., Verguts, T., Yeung, N., 2019b. A Postdecisional Neural
- 719 Marker of Confidence Predicts Information-Seeking in Decision-Making. *J. Neurosci.* 39,
- 720 3309–3319. <https://doi.org/10.1101/433276>
- 721 Di Gregorio, F., Maier, M.E., Steinhauser, M., 2018. Errors can elicit an error positivity in the

- 722 absence of an error negativity: Evidence for independent systems of human error  
723 monitoring. *Neuroimage* 172, 427–436. <https://doi.org/10.1016/j.neuroimage.2018.01.081>
- 724 Dodson, C.S., Bawa, S., Krueger, L.E., 2007. Aging, metamemory, and high-confidence errors:  
725 A misrecollection account. *Psychol. Aging* 22, 122–133. [https://doi.org/10.1037/0882-](https://doi.org/10.1037/0882-7974.22.1.122)  
726 [7974.22.1.122](https://doi.org/10.1037/0882-7974.22.1.122)
- 727 Dully, J., McGovern, D.P., O’Connell, R.G., 2018. The impact of natural aging on computational  
728 and neural indices of perceptual decision making: A review. *Behav. Brain Res.* 355, 48–55.  
729 <https://doi.org/10.1016/j.bbr.2018.02.001>
- 730 Endrass, T., Klawohn, J., Preuss, J., Kathmann, N., 2012a. Temporospatial dissociation of Pe  
731 subcomponents for perceived and unperceived errors. *Front. Hum. Neurosci.* 6, 1–10.  
732 <https://doi.org/10.3389/fnhum.2012.00178>
- 733 Endrass, T., Schreiber, M., Kathmann, N., 2012b. Speeding up older adults: Age-effects on error  
734 processing in speed and accuracy conditions. *Biol. Psychol.* 89, 426–432.  
735 <https://doi.org/10.1016/j.biopsycho.2011.12.005>
- 736 Eriksen, B.A., Eriksen, C.W., 1974. Effects of noise letters upon the identification of a target  
737 letter in a nonsearch task. *Percept. Psychophys.* 16, 143–149.
- 738 Falkenstein, M., Hohnsbein, J., Hoormann, J., Blanke, L., 1991. Effects of crossmodal divided  
739 attention on late ERP components. II. Error processing in choice reaction tasks.  
740 *Electroencephalogr. Clin. Neurophysiol.* 78, 447–455. [https://doi.org/10.1016/0013-](https://doi.org/10.1016/0013-4694(91)90062-9)  
741 [4694\(91\)90062-9](https://doi.org/10.1016/0013-4694(91)90062-9)
- 742 Falkenstein, M., Hoormann, J., Christ, S., Hohnsbein, J., 2000. ERP components on reaction  
743 errors and their functional significance: A tutorial. *Biol. Psychol.* 51, 87–107.  
744 [https://doi.org/10.1016/S0301-0511\(99\)00031-9](https://doi.org/10.1016/S0301-0511(99)00031-9)
- 745 Falkenstein, M., Hoormann, J., Hohnsbein, J., 2001. Changes of error-related ERPs with age.

- 746 Exp. Brain Res. 138, 258–262. <https://doi.org/10.1007/s002210100712>
- 747 Fitzgerald, L.M., Arvaneh, M., Dockree, P.M., 2017. Domain-specific and domain-general  
748 processes underlying metacognitive judgments. *Conscious. Cogn.* 49, 264–277.  
749 <https://doi.org/10.1016/j.concog.2017.01.011>
- 750 Fleming, S.M., Dolan, R.J., 2012. The neural basis of metacognitive ability.  
751 [royalsocietypublishing.org](https://royalsocietypublishing.org) 367, 1338–1349. <https://doi.org/10.1098/rstb.2011.0417>
- 752 Fleming, S.M., Dolan, R.J., Frith, C.D., 2012. Metacognition: Computation, biology and  
753 function. *Philos. Trans. R. Soc. B Biol. Sci.* 367, 1280–1286.  
754 <https://doi.org/10.1098/rstb.2012.0021>
- 755 Fleming, S.M., Frith, C.D., 2014. *The Cognitive Neuroscience of Metacognition, The Cognitive*  
756 *Neuroscience of Metacognition*. Springer. <https://doi.org/10.1007/978-3-642-45190-4>
- 757 Fleming, S.M., Lau, H.C., 2014. How to measure metacognition. *Front. Hum. Neurosci.* 8, 1–9.  
758 <https://doi.org/10.3389/fnhum.2014.00443>
- 759 Folstein, M.F., Folstein, S.E., McHugh, P.R., 1975. “Mini-mental state”. A practical method for  
760 grading the cognitive state of patients for the clinician. *J. Psychiatr. Res.* 12, 189–198.  
761 [https://doi.org/10.1016/0022-3956\(75\)90026-6](https://doi.org/10.1016/0022-3956(75)90026-6)
- 762 Galvin, S.J., Podd, J. V., Drga, V., Whitmore, J., 2003. Type 2 tasks in the theory of signal  
763 detectability: Discrimination between correct and incorrect decisions. *Psychon. Bull. Rev.*  
764 10, 843–876. <https://doi.org/10.3758/BF03196546>
- 765 Groom, M.J., Cragg, L., 2015. Differential modulation of the N2 and P3 event-related potentials  
766 by response conflict and inhibition. *Brain Cogn.* 97, 1–9.  
767 <https://doi.org/10.1016/j.bandc.2015.04.004>
- 768 Hansson, P., Rönnlund, M., Juslin, P., Nilsson, L.G., 2008. Adult Age Differences in the Realism  
769 of Confidence Judgments: Overconfidence, Format Dependence, and Cognitive Predictors.

- 770 Psychol. Aging 23, 531–544. <https://doi.org/10.1037/a0012782>
- 771 Harty, S., Murphy, P.R., Robertson, I.H., O’Connell, R.G., 2017. Parsing the neural signatures of  
772 reduced error detection in older age. *Neuroimage* 161, 43–55.  
773 <https://doi.org/10.1016/j.neuroimage.2017.08.032>
- 774 Harty, S., O’Connell, R.G., Hester, R., Robertson, I.H., 2013. Older adults have diminished  
775 awareness of errors in the laboratory and daily life. *Psychol. Aging* 28, 1032–1041.  
776 <https://doi.org/10.1037/a0033567>
- 777 Hautzinger, M., 1991. The Beck Depression Inventory in clinical practice. *Nervenarzt* 62, 689–  
778 96.
- 779 Hertzog, C., 2015. Aging and Metacognitive Control, *The Oxford Handbook of Metamemory*.  
780 <https://doi.org/10.1093/oxfordhb/9780199336746.013.31>
- 781 Hertzog, C., Hultsch, D., 2000. Metacognition in adulthood and old age., in: Craik, F.I.M.,  
782 Salthouse, T.A. (Eds.), *The Handbook of Aging and Cognition*. Lawrence Erlbaum  
783 Associates Publishers, pp. 417–466.
- 784 Hoerold, D., Pender, N., Robertson IH, 2013. mende. *Neuropsychologia* 51, 385–391.
- 785 Jasper, H., 1958. The ten twenty electrode system of the international federation.  
786 *Electroencephalogr. Clin. Neurophysiol.* 10, 371–375.
- 787 Kayser, J., Tenke, C.E., 2006. Principal components analysis of Laplacian waveforms as a  
788 generic method for identifying ERP generator patterns: II. Adequacy of low-density  
789 estimates. *Clin. Neurophysiol.* 117, 369–380. <https://doi.org/10.1016/j.clinph.2005.08.033>
- 790 Kornell, N., Son, L.K., Terrace, H.S., 2007. Transfer of metacognitive skills and hint seeking in  
791 monkeys: Research article. *Psychol. Sci.* 18, 64–71. [https://doi.org/10.1111/j.1467-](https://doi.org/10.1111/j.1467-9280.2007.01850.x)  
792 [9280.2007.01850.x](https://doi.org/10.1111/j.1467-9280.2007.01850.x)
- 793 Korsch, M., Frühholz, S., Herrmann, M., 2016. Conflict-specific aging effects mainly manifest in

- 794 early information processing stages-an ERP study with different conflict types. *Front. Aging*  
795 *Neurosci.* 8, 1–12. <https://doi.org/10.3389/fnagi.2016.00053>
- 796 Larson, M.J., Clayson, P.E., 2011. The relationship between cognitive performance and  
797 electrophysiological indices of performance monitoring. *Cogn. Affect. Behav. Neurosci.* 11,  
798 159–171. <https://doi.org/10.3758/s13415-010-0018-6>
- 799 Larson, M.J., Clayson, P.E., Keith, C.M., Hunt, I.J., Hedges, D.W., Nielsen, B.L., Call,  
800 V.R.A.V.R.A., 2016. Cognitive control adjustments in healthy older and younger adults:  
801 Conflict adaptation, the error-related negativity (ERN), and evidence of generalized decline  
802 with age. *Biol. Psychol.* 115, 50–63. <https://doi.org/10.1016/j.biopsycho.2016.01.008>
- 803 Larson, M.J., South, M., Clayson, P.E., 2011. Sex differences in error-related performance  
804 monitoring. *Neuroreport* 22, 44–48. <https://doi.org/10.1097/WNR.0b013e3283427403>
- 805 Lopez-Calderon, J., Luck, S.J., 2014. ERPLAB: An open-source toolbox for the analysis of  
806 event-related potentials. *Front. Hum. Neurosci.* 8, 1–14.  
807 <https://doi.org/10.3389/fnhum.2014.00213>
- 808 Lucci, G., Berchicci, M., Spinelli, D., Taddei, F., Di Russo, F., 2013. The Effects of Aging on  
809 Conflict Detection. *PLoS One* 8. <https://doi.org/10.1371/journal.pone.0056566>
- 810 Maier, M.E., Steinhauser, M., 2017. Working memory load impairs the evaluation of behavioral  
811 errors in the medial frontal cortex. *Psychophysiology* 54, 1472–1482.  
812 <https://doi.org/10.1111/psyp.12899>
- 813 Maier, M.E., Steinhauser, M., Hübner, R., 2008. Is the Error-related Negativity Amplitude  
814 Related to Error Detectability? Evidence from Effects of Different Error Types. *J. Cogn.*  
815 *Neurosci.* 20, 2263–2273.
- 816 Maniscalco, B., Lau, H., 2012. A signal detection theoretic approach for estimating  
817 metacognitive sensitivity from confidence ratings. *Conscious. Cogn.* 21, 422–430.

- 818 <https://doi.org/10.1016/j.concog.2011.09.021>
- 819 Mattler, U., 2003. Delayed flanker effects on lateralized readiness potentials. *Exp. Brain Res.*
- 820 151, 272–288. <https://doi.org/10.1007/s00221-003-1486-5>
- 821 Mecacci, L., Righi, S., 2006. Cognitive failures, metacognitive beliefs and aging. *Pers. Individ.*
- 822 *Dif.* 40, 1453–1459. <https://doi.org/10.1016/j.paid.2005.11.022>
- 823 Murphy, P.R., Robertson, I.H., Harty, S.S., O’Connell, R.G., O’Connell, R.G., 2015. Neural
- 824 evidence accumulation persists after choice to inform metacognitive judgments. *Elife* 4, 1–
- 825 23. <https://doi.org/10.7554/eLife.11946>
- 826 Nelson, T., 1984. A comparison of current measures of the accuracy of feeling-of-knowing
- 827 predictions. *Psychol. Bull.* 95, 109–133.
- 828 Niessen, E., Fink, G.R., Hoffmann, H.E.M.M., Weiss, P.H., Stahl, J., 2017. Error detection across
- 829 the adult lifespan: Electrophysiological evidence for age-related deficits. *Neuroimage* 152,
- 830 517–529. <https://doi.org/10.1016/j.neuroimage.2017.03.015>
- 831 Nieuwenhuis, S., Richard Ridderinkhof, K., Blom, J., Band, G.P.H., Kok, A., 2001. Error-related
- 832 brain potentials are differentially related to awareness of response errors: Evidence from an
- 833 antisaccade task. *Psychophysiology* 38, 752–760.
- 834 <https://doi.org/10.1017/S0048577201001111>
- 835 Oldfield, R.C., 1971. The assessment and analysis of handedness: The Edinburgh inventory.
- 836 *Neuropsychologia* 9, 97–113. [https://doi.org/10.1016/0028-3932\(71\)90067-4](https://doi.org/10.1016/0028-3932(71)90067-4)
- 837 Palmer, E.C., David, A.S., Fleming, S.M., 2014. Effects of age on metacognitive efficiency.
- 838 *Conscious. Cogn.* 28, 151–160. <https://doi.org/10.1016/j.concog.2014.06.007>
- 839 Pennequin, V., Sorel, O., Mainguy, M., 2010. Metacognition, executive functions and aging: The
- 840 effect of training in the use of metacognitive skills to solve mathematical word problems. *J.*
- 841 *Adult Dev.* 17, 168–176. <https://doi.org/10.1007/s10804-010-9098-3>

- 842 Perrin, F., Pernier, J., Bertrand, O., Echallier, J.F., 1989. Spherical splines for scalp potential and  
843 current density mapping. *Electroencephalogr. Clin. Neurophysiol.* 72, 184–187.  
844 [https://doi.org/10.1016/0013-4694\(89\)90180-6](https://doi.org/10.1016/0013-4694(89)90180-6)
- 845 Polich, J., 2007. Updating P300: an integrative theory of P3a and P3b. *Clin. Neurophysiol.* 118,  
846 2128–2148. <https://doi.org/10.1016/j.clinph.2007.04.019>
- 847 Pontifex, M.B., Scudder, M.R., Brown, M.L., O’Leary, K.C., Wu, C.T., Themanson, J.R.,  
848 Hillman, C.H., 2010. On the number of trials necessary for stabilization of error-related  
849 brain activity across the life span. *Psychophysiology* 47, 767–773.  
850 <https://doi.org/10.1111/j.1469-8986.2010.00974.x>
- 851 Pouget, A., Drugowitsch, J., Kepecs, A., 2016. Confidence and certainty: distinct probabilistic  
852 quantities for different goals. *nature.com*. <https://doi.org/10.1038/nn.4240>
- 853 Rabbitt, P., 1990. Age, IQ and awareness, and recall of errors. *Ergonomics* 33, 1291–1305.  
854 <https://doi.org/10.1080/00140139008925333>
- 855 Rabbitt, P.M.A., 1966. Errors and error correction in choice-response tasks. *Exp. Psychol.* 71,  
856 264–272. <https://doi.org/10.1037/h0022853>
- 857 Rahnev, D., Desender, K., Lee, A.L.F., Adler, W.T., Aguilar-Lleyda, D., Akdoğan, B., Arbuzova,  
858 P., Atlas, L.Y., Balci, F., Bang, J.W., Bègue, I., Birney, D.P., Brady, T.F., Calder-Travis, J.,  
859 Chetverikov, A., Clark, T.K., Davranche, K., Denison, R.N., Dildine, T.C., Double, K.S.,  
860 Duyan, Y.A., Faivre, N., Fallow, K., Filevich, E., Gajdos, T., Gallagher, R.M., de Gardelle,  
861 V., Gherman, S., Haddara, N., Hainguerlot, M., Hsu, T.Y., Hu, X., Iturrate, I., Jaquierey, M.,  
862 Kantner, J., Koculak, M., Konishi, M., Koß, C., Kvam, P.D., Kwok, S.C., Lebreton, M.,  
863 Lempert, K.M., Ming Lo, C., Luo, L., Maniscalco, B., Martin, A., Massoni, S., Matthews, J.,  
864 Mazancieux, A., Merfeld, D.M., O’Hora, D., Palser, E.R., Paulewicz, B., Pereira, M., Peters,  
865 C., Philiastides, M.G., Pfuhl, G., Prieto, F., Rausch, M., Recht, S., Reyes, G., Rouault, M.,

- 866 Sackur, J., Sadeghi, S., Samaha, J., Seow, T.X.F., Shekhar, M., Sherman, M.T., Siedlecka,  
867 M., Skóra, Z., Song, C., Soto, D., Sun, S., van Boxtel, J.J.A., Wang, S., Weidemann, C.T.,  
868 Weindel, G., Wierzchoń, M., Xu, X., Ye, Q., Yeon, J., Zou, F., Zylberberg, A., 2020. The  
869 Confidence Database. *Nat. Hum. Behav.* 4, 317–325. [https://doi.org/10.1038/s41562-019-](https://doi.org/10.1038/s41562-019-0813-1)  
870 0813-1
- 871 Rausch, M., Zehetleitner, M., Steinhauser, M., Maier, M.E., 2019. Cognitive modelling reveals  
872 distinct electrophysiological markers of decision confidence and error monitoring. *bioRxiv*  
873 860379. <https://doi.org/10.1101/860379>
- 874 Ross, L.A., Dodson, J., Edwards, J.D., Ackerman, M.L., Ball, K., 2012. Self-rated Driving and  
875 Driving Safety in Older Adults. *Accid. Anal. Prev.* 48, 523–527.  
876 <https://doi.org/10.1038/jid.2014.371>
- 877 Ruitenbergh, M.F.L., Abrahamse, E.L., De Kleine, E., Verwey, W.B., 2014. Post-error slowing in  
878 sequential action: An aging study. *Front. Psychol.* 5, 1–8.  
879 <https://doi.org/10.3389/fpsyg.2014.00119>
- 880 Scheffers, M.K., Coles, M.G.H., 2000. Performance monitoring in a confusing world: Error-  
881 related brain activity, judgments of response accuracy, and types of errors. *J. Exp. Psychol.*  
882 *Hum. Percept. Perform.* 26, 141–151. <https://doi.org/10.1037/0096-1523.26.1.141>
- 883 Schreiber, M., Pietschmann, M., Kathmann, N., Endrass, T., 2011. ERP correlates of  
884 performance monitoring in elderly. *Brain Cogn.* 76, 131–139.  
885 <https://doi.org/10.1016/j.bandc.2011.02.003>
- 886 Shekhar, M., Rahnev, D., 2020. The Nature of Metacognitive Inefficiency in Perceptual Decision  
887 Making. *Psychol. Rev.* 1–83. <https://doi.org/10.1037/rev0000249>
- 888 Sim, J., Brown, F., O’Connell, R., Hester, R., 2020. Impaired error awareness in healthy older  
889 adults: an age group comparison study. *Neurobiol. Aging.*



- 890 <https://doi.org/10.1016/j.neurobiolaging.2020.08.001>
- 891 Siswandari, Y., Bode, S., Stahl, J., 2019. Performance monitoring beyond choice tasks: The time  
892 course of force execution monitoring investigated by event-related potentials and  
893 multivariate pattern analysis. *Neuroimage* 197, 544–556.  
894 <https://doi.org/10.1016/j.neuroimage.2019.05.006>
- 895 Song, C., Kanai, R., Fleming, S.M., Weil, R.S., Schwarzkopf, D.S., Rees, G., 2011. Relating  
896 inter-individual differences in metacognitive performance on different perceptual tasks.  
897 *Conscious. Cogn.* 20, 1787–1792. <https://doi.org/10.1016/j.concog.2010.12.011>
- 898 Stahl, J., Mattes, A., Hundrieser, M., Kummer, K., Mück, M., Niessen, E., Porth, E., Siswandari,  
899 Y., Wolters, P., Dummel, S., 2020. Neural correlates of error detection during complex  
900 response selection: Introduction of a novel eight-alternative response task. *Biol. Psychol.*  
901 156. <https://doi.org/10.1016/j.biopsycho.2020.107969>
- 902 Steinhauser, M., Yeung, N., 2010. Decision processes in human performance monitoring. *J.*  
903 *Neurosci.* 30, 15643–15653. <https://doi.org/10.1523/JNEUROSCI.1899-10.2010>
- 904 Vidal, F., Burle, B., Bonnet, M., Grapperon, J., Hasbroucq, T., 2003. Error negativity on correct  
905 trials: a reexamination of available data. *Biol. Psychol.* 64, 265–282.  
906 [https://doi.org/10.1016/S0301-0511\(03\)00097-8](https://doi.org/10.1016/S0301-0511(03)00097-8)
- 907 Wessel, J.R., 2012. Error awareness and the error-related negativity: evaluating the first decade  
908 of evidence. *Front. Hum. Neurosci.* 6, 1–16. <https://doi.org/10.3389/fnhum.2012.00088>
- 909 Wessel, J.R., Dolan, K.A., Hollingworth, A., 2018. A blunted phasic autonomic response to  
910 errors indexes age-related deficits in error awareness. *Neurobiol. Aging* 71, 13–20.  
911 <https://doi.org/10.1016/j.neurobiolaging.2018.06.019>
- 912 Yeung, N., Botvinick, M.M., Cohen, J.D., 2004. The neural basis of error detection: conflict  
913 monitoring and the error-related negativity. *Psychol. Rev.* 111, 931–959.

914 <https://doi.org/10.1037/0033-295X.111.4.931>

915 Yeung, N., Cohen, J.D., 2006. The Impact of Cognitive Deficits on Conflict

916 Monitoring Predictable Dissociations Between the Error-Related Negativity and N2.

917 Psychol. Sci. 17, 164–171.

918 Yeung, N., Summerfield, C., 2014. Shared mechanisms for confidence judgements and error

919 detection in human decision making, in: The Cognitive Neuroscience of Metacognition.

920 Springer-Verlag Berlin Heidelberg, pp. 147–167. [https://doi.org/10.1007/978-3-642-45190-](https://doi.org/10.1007/978-3-642-45190-4_7)

921 [4\\_7](https://doi.org/10.1007/978-3-642-45190-4_7)

922
